# Supplementary material for: Sandwich-structure hydrogels implement on-demand release of multiple therapeutic drugs for infected wounds
Source: Royal Society of Chemistry journal article supplement (doi:10.1039/c9ra09412a), 2019-01-01
Supplement: c9ra09412a1.pdf [file c9ra09412a1.pdf]

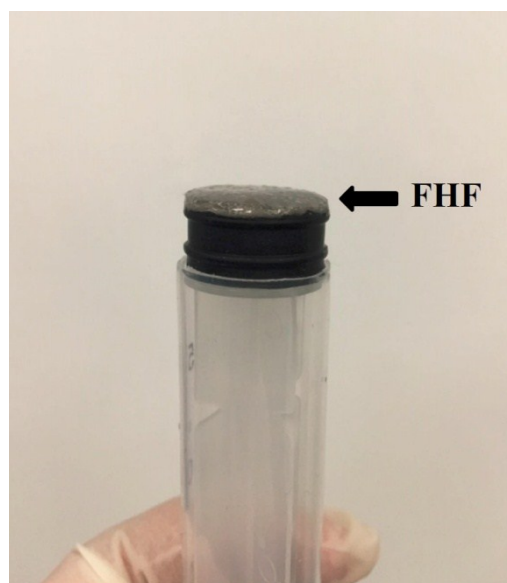

**Figure S1. Appearance of sandwich-structure hydrogel dressing.**

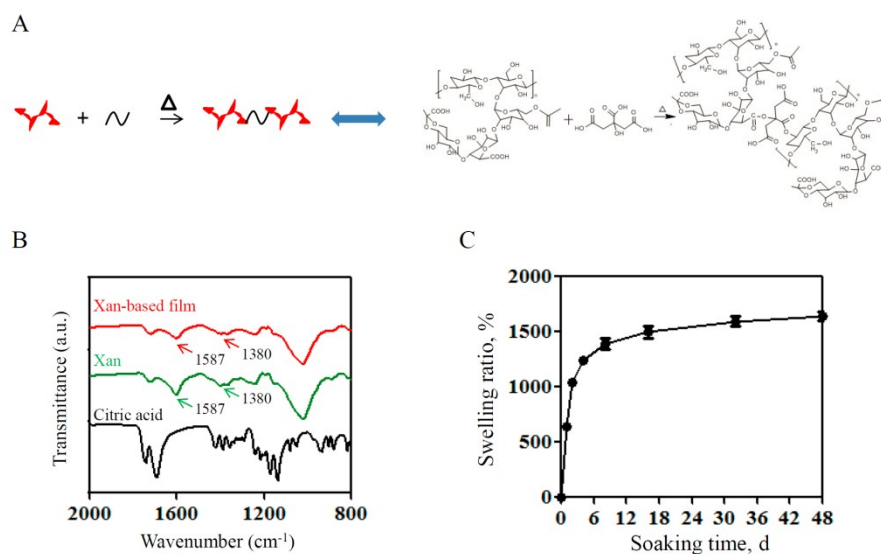

**Figure S2. Synthesis of xan-based film.** (A) Crosslinking reaction of xan and citric acid. (B) FTIR spectrometry to verify the synthesis of xan-based film. (C) Swelling ratio of xan-based film.

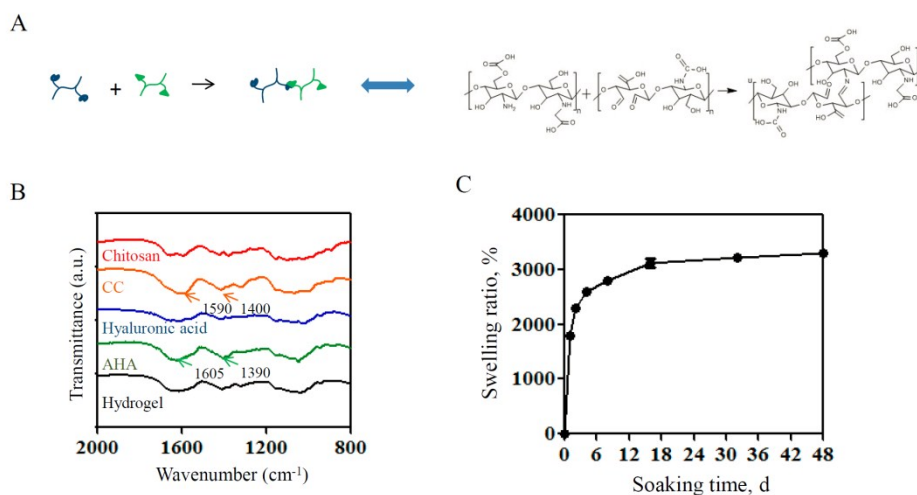

**Figure S3. Synthesis of CC/AHA hydrogel.** (A) Schiff's base reaction of CC and AHA. (B) FTIR spectrometry to verify the synthesis of CC/AHA hydrogel. (C) Swelling ratio of CC/AHA hydrogel.

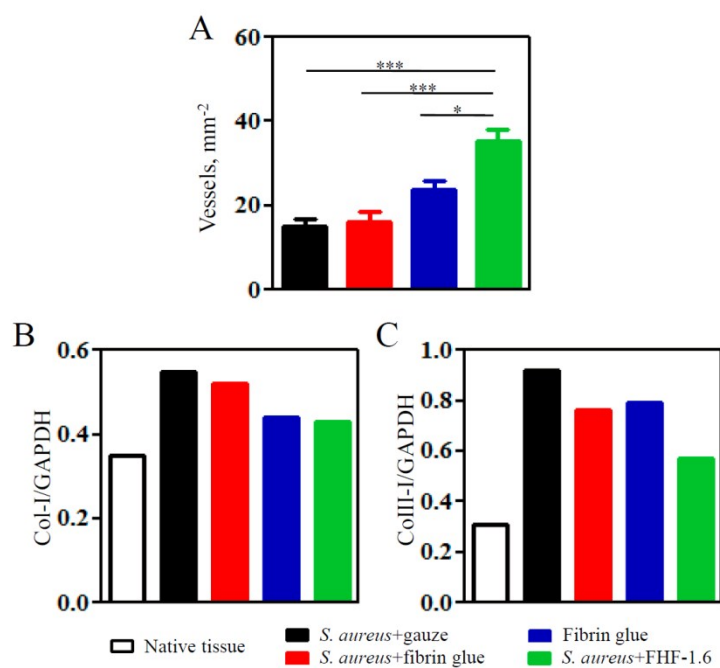

**Figure S4. Quantitative analysis results.** (A) Vessel density in granulation tissues, analyzed by one-way ANOVA. (B) Relative Collagen-I expression, analyzed by Image J. (C) Relative Collagen-III expression, analyzed by Image J. \*,  $p < 0.05$ ; \*\*\*,  $p < 0.001$ .

| Gene           | Genebank#    | Forward (5'-3')            | Reverse (5'-3')                  |
|----------------|--------------|----------------------------|----------------------------------|
| $\beta$ -actin | NM_001101683 | CCAAAGTCCCCAAAGTTC<br>TGCA | CGATATTTGGAATGACTAT<br>CAAAAGAAA |
| IL-1 $\beta$   | NM_001082201 | CCTCTCTTACCTCTGCCAT<br>TC  | CCTCTGGTCTCCTTGGATTA<br>AA       |
| IL-17 $\beta$  | XM_002710301 | CAAAGCCATTCGCCCCGTA        | CAGGGAGATAGACTCCTCT<br>TGT       |
| Inf- $\gamma$  | NM_001081991 | CCTCACTCTCTCTGAAGC<br>AATG | AGGTGTTCTGTTTCTCTGGT<br>TAG      |
| TNF            | NM_001082263 | CCTTCCTCTCCTCAGATG<br>TTTC | GCGCTGAGCTTCCAAATAA<br>AT        |

**Table S1. Primer sequences of proinflammatory cytokines.**
